# Supplementary material for: Equity-centered adaptive sampling in sub-sewershed wastewater surveillance using census data
Source: Royal Society of Chemistry journal article supplement (doi:10.1039/d4ew00552j), 2024-10-24
Supplement: d4ew00552j1.pdf [file d4ew00552j1.pdf]

## Supplementary Information

# Equity-Centered Adaptive Sampling in Sub-Sewershed Wastewater Surveillance Using Census Data

Amita Muralidharan,<sup>a</sup> Rachel Olson,<sup>a</sup> C. Winston Bess,<sup>a</sup> Heather N. Bischel<sup>\*a</sup>

<sup>a</sup> *Department of Civil and Environmental Engineering, University of California Davis, Davis, California 95616, United States.*

\* Corresponding author.

Keywords: health equity, wastewater surveillance, probabilistic assignment, census block, SARS-CoV-2, wastewater-based epidemiology

Synopsis: Identifying strategies to design wastewater sampling frameworks that equitably represent diverse populations within sampling areas.

## List of tables included

### *Tables*

- **Table S1.** Primer and probe sequences for the specified targets.
- **Table S2.** Cycling conditions for the RT-ddPCR process.
- **Table S3.** Limit of blank (LOB, reported as a rank position value) and limit of detection (LOD), as reported in Daza-Torres et al. (2023).
- **Table S4.** Sub-sewershed zones and their populations.
- **Table S5.** Correlation of wastewater data for each sub-sewershed zone (population-weighted moving average) with the overall COD WWTP data (moving average).

## Supplementary tables

**Table S1.** Primer and probe sequences for the specified targets.

| Target        | Oligonucleotide | Primer Sequence (5' → 3')       | Fluorophore |
|---------------|-----------------|---------------------------------|-------------|
| SARS-CoV-2 N1 | Forward         | GAC CCC AAA ATC AGC GAA AT      | FAM         |
|               | Reverse         | TCT GGT TAC TGC CAG TTG AAT CTG |             |
|               | Probe           | ACC CCG CAT TAC GTT TGG TGG ACC |             |
| SARS-CoV-2 N2 | Forward         | TTA CAA ACA TTG GCC GCA AA      | VIC         |
|               | Reverse         | GCG CGA CAT TCC GAA GAA         |             |
|               | Probe           | ACA ATT TGC CCC CAG CGC TTC AG  |             |
| BCoV          | Forward         | CTGGAAGTTGGTGGAGTT              | HEX         |
|               | Reverse         | ATTATCGGCCTAACATACATC           |             |
|               | Probe           | CCTTCATATCTATACACATCAAGTTGTT    |             |
| PMMoV         | Forward         | GAGTGGTTTGACCTTAACGTTTGA        | FAM         |
|               | Reverse         | TTGTCGGTTGCAATGCAAGT            |             |
|               | Probe           | CCTA+C+C+GAAGCA+A+A+TG          |             |

**Table S2.** Cycling conditions for the RT-ddPCR process.

| Cycling step          | Temp (°C) | Time   | # Cycles |
|-----------------------|-----------|--------|----------|
| Plate equilibrium     | 25        | 3 min  | 1        |
| Reverse Transcription | 50        | 60 min | 1        |
| Enzyme activation     | 95        | 10 min | 1        |
| Denaturation          | 94        | 30 sec | 40       |
| Annealing/Extension   | 58        | 1 min  |          |
| Enzyme Deactivation   | 98        | 10 min | 1        |
| Droplet Stabilization | 25        | 1 min  | 1        |

**Table S3.** Limit of blank (LOB, reported as a rank position value) and limit of detection (LOD), as reported in Daza-Torres et al. (2023).

|                                |    | LoB    | STD   | Theoretical LOD |
|--------------------------------|----|--------|-------|-----------------|
| Conc (copies/mL of wastewater) | N1 | 13.605 | 5.547 | 24.700          |
|                                | N2 | 18.544 | 6.712 | 31.967          |
| Conc (copies/mL of wastewater) | N1 | 3.401  | 1.387 | 6.175           |
|                                | N2 | 4.636  | 1.678 | 7.992           |

**Table S4.** Sub- and their

sewershed zones populations.

| Sub-sewershed Zone | Population |
|--------------------|------------|
| SR-A               | 12389      |
| SR-B               | 7936       |
| SR-C               | 15920      |
| SR-D               | 1324       |
| SR-E               | 1794       |
| SR-F               | 3920       |
| SR-G               | 5935       |
| SR-H               | 3696       |
| SR-I               | 10912      |

**Table S5.** Correlation of wastewater data for each sub-sewershed zone (population-weighted moving average) with the overall COD WWTP data (moving average).

| <b>Zone Name</b> | <b>Correlation Coefficient</b> | <b>P-Value</b> |
|------------------|--------------------------------|----------------|
| SR-A             | 0.770                          | 4.19e-15       |
| SR-B1            | 0.935                          | 8.81e-33       |
| SR-B2            | 0.836                          | 1.24e-19       |
| SR-B3            | 0.927                          | 4.69e-31       |
| SR-B4            | 0.922                          | 3.26e-30       |
| SR-C1            | 0.793                          | 1.69e-16       |
| SR-C2            | 0.890                          | 3.22e-25       |
| SR-D             | 0.734                          | 3.15e-13       |
| SR-E             | 0.877                          | 1.13e-23       |
| SR-F1            | 0.877                          | 1.24e-23       |
| SR-F2            | 0.870                          | 6.78e-23       |
| SR-G             | 0.738                          | 2.20e-13       |
| SR-H             | 0.733                          | 3.88e-13       |
| SR-I             | 0.866                          | 1.92e-22       |
